# Supplementary material for: Carbon-Conjugated Co Complexes as Model Electrocatalysts for Oxygen Reduction Reaction
Source: MDPI journal article supplement (doi:10.3390/catal13020330), 2023-02-02
Supplement: s1 [file s1]

Archive with 1 entries (1 files):
- catalysts-2126146-supplementary.pdf
